# Supplementary material for: Improving age-depth correlations by using the LANDO model ensemble
Source: Copernicus journal article supplement (doi:10.5194/gchron-2021-40), 2021-12-02
Supplement: Supplementary file [file gchron-2021-40-AC2-supplement.pdf]

Dear colleagues,

We very much appreciate the extra effort you have shown with your helpful community comment. Your feedback ensures that we can provide and maintain a high quality publication.

In the attached .pdf response file (supplement), we provide detailed replies to each individual comment and provide our proposed changes and adjustments to the manuscript that we will carry out and show within the revised manuscript version. We have therefore highlighted your comments in black and *italics* and highlighted our responses in blue.

Thank you once again for taking the time to provide feedback on our manuscript.

On behalf of all the authors,

Gregor Pfalz

---

*(i) Data reference, availability and usage*

*The origin of the data used in the third case study in most cases is not visible directly from the manuscript but has to be investigated via a “Code and Data availability” spreadsheet, which can be accessed by an attached GitHub link. This spreadsheet in 41 cases provides links to the open and free data repository PANGAEA or original publications, which not always contain the original data and descriptions of age model developments (see below), and in 33 cases the reader is asked to request unpublished data. Once access to the data is accomplished, it is not clear from the manuscript in its present form, which of the existing age data eventually became used in the third case study (see example below).*

*In our mind the relevant original publications existing have to be cited in the manuscript directly and included in the reference list, the data used in the third case study has to be clarified, and the unpublished data used has to be presented in a table in this paper or at least made freely accessible via an open database.*

Thank you for the valuable comment. We agree that it is relevant for the reader to be aware of the underlying data used for our calculations. Fortunately, since the submission of the manuscript, several unpublished datasets have become available in journals. We found only seven unpublished datasets that we would exclude from the revised version. In addition, for all of our sediment cores, we shall refer to the publications with the originally published data and age-depth model. We also qualitatively compared the LANDO model results with the original published age-depth model version and adjusted our LANDO model where needed, for example in the cases listed below.

Following your suggestion, we shall add a table on data availability within the manuscript containing six columns: "CoreID", "PaleoLake Database ID", "Age-Depth Model Available", "Repository", "Accessible", and "Paper Reference". Furthermore, we shall include the references given in this

table in the main references of the publication. We will remove the spreadsheet from the GitHub repository. Instead, we shall also add a table with all dating points from the references in the supporting material to make it easier for the reader to follow the data.

(ii) *Missing geological context*

*The LANDO-derived sedimentation rates displayed for 39 sediment cores in Figures 5 and S1 suggest continuous sedimentation up to 21 cal ka BP with variable rates. Some of these sedimentation rates are obviously wrong, due to missing consideration of geological evidence. Two examples are given below.*

It is true that some of the sedimentation rates do not reflect the actual sedimentation rates compared to age-depth models derived using geological evidence. For this reason, we already wrote on Page 21, Lines 527-528 “Even though LANDO can produce age-depth models for multiple sediment cores (“Multiple cores” – CS3), we must assume limitations in the geoscientific validity for some of the results.” Since our approach is purely data-driven, i.e., without geological interpretation, we are aware that “[...] the results from our combined model might over- or underestimate the true sedimentation rate[s]” (Page 21, Lines 531-532). Our overall purpose was to make LANDO user-friendly enough to allow users to analyze multiple sediment cores without special customizations.

Thanks to your comment, we see that we need to give LANDO users more flexibility. In the revised version, we will mention in the manuscript that LANDO works best in multi-core mode when users have continuous dating series, i.e., only cores without hiatus. We are already planning another paper / technical note to update LANDO for purposes other than lake sediments. Our goal in the next paper is to accommodate user customizations for single sediment cores (such as hiatus or special calibration curves) within a multi-core collection.

*First, the sedimentation rates derived for core Co1309 from Ladoga Lake are based on age data, which according to the “Code and Data availability” spreadsheet originate from Andreev et al. (2019) and Savelieva et al. (2019). However, Andreev et al. (2019) only present OSL ages between 118 and 80 ka BP, substantially exceeding the age range of interest here. Savelieva et al. (2019) present the radiocarbon and OSL ages available from the postglacial part of the record, but mention that the age-depth model used originates from Gromig et al. (2019, in *Boreas*, 48: 330-348), a paper not cited in the manuscript. Gromig et al. (2019) excluded some of the radiocarbon and OSL ages and, on the other hand, added additional age control from varve chronology and correlation with a radiocarbon-dated record close by. Hence, from the references provided it is unclear, which data finally became used for the LANDO calculations presented. Moreover, both Andreev et al. (2019) and Savelieva et al. (2019) mention that the record contains an obvious hiatus, which spans ca. 14-80 ka BP and is described in detail by Gromig et al. (2019). This hiatus is ignored by the LANDO calculations presented, leading to false data at least for the period 21 - 14 ka BP.*

It is correct that we used dating points derived from Andreev et al. (2019) and Savelieva et al. (2019) for Co1309 (Lake Ladoga). **Table 1** represents the input data of Co1309 to LANDO in our original version of the manuscript and **Figure 1** shows the resulting output.

**Table 1** – *Input data of Co1309 based on Andreev et al. (2019) and Savelieva et al. (2019). LANDO input parameters “Lab-Location”, “Weight”, “Pretreatment”, “Reservoir Age”, and “Reservoir Error” not included in this table for readability.*

| MeasurementID | Thickness (cm) | LabID       | Category                           | Material              | Uncalibrated Age (yr BP) | Uncalibrated Age Error (+/- yr) |
|---------------|----------------|-------------|------------------------------------|-----------------------|--------------------------|---------------------------------|
| Co1309 35     | 1              | Co14057     | <sup>14</sup> C terrestrial fossil | organic macro remains | 2470                     | 54                              |
| Co1309 126.8  | 1              | Co14061.1.1 | <sup>14</sup> C terrestrial fossil | organic macro remains | 6681                     | 58                              |
| Co1309 130    | 10             | C-L3832     | other                              | quartz silt fraction  | 7000                     | 300                             |
| Co1309 131.8  | 1              | Co14065.1.1 | <sup>14</sup> C terrestrial fossil | organic macro remains | 10921                    | 68                              |
| Co1309 152.8  | 1              | Co14062.1.1 | <sup>14</sup> C terrestrial fossil | organic macro remains | 12214                    | 69                              |
| Co1309 533    | 10             | C-L3835     | other                              | quartz silt fraction  | 14000                    | 900                             |
| Co1309 743    | 10             | C-L3836     | other                              | quartz silt fraction  | 17300                    | 800                             |
| Co1309 960    | 10             | C-L3837     | other                              | quartz silt fraction  | 21800                    | 1100                            |
| Co1309 1166   | 10             | C-L3838     | other                              | quartz silt fraction  | 23400                    | 1400                            |
| Co1309 1403   | 10             | C-L3839     | other                              | quartz silt fraction  | 82200                    | 7800                            |
| Co1309 1775   | 10             | C-L3841     | other                              | quartz silt fraction  | 90300                    | 5300                            |
| Co1309 1977   | 10             | C-L3842     | other                              | quartz silt fraction  | 112800                   | 4900                            |
| Co1309 2160   | 10             | C-L3843     | other                              | quartz silt fraction  | 117600                   | 12600                           |

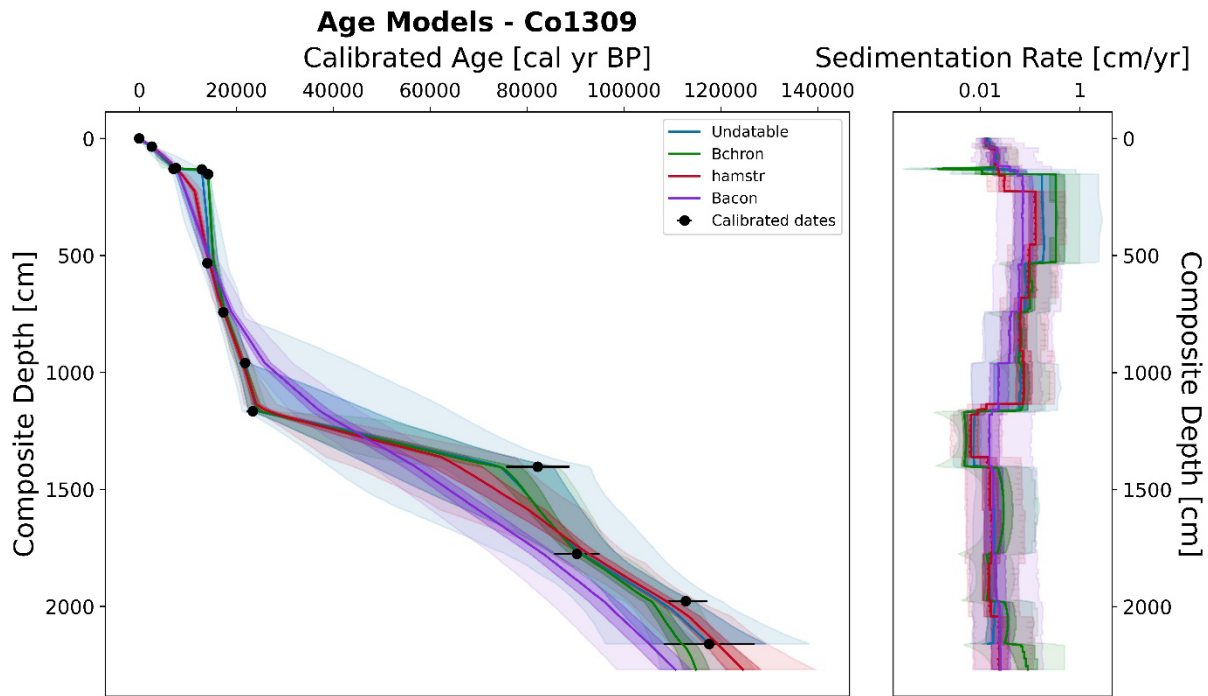

**Figure 1** – Previous (first submission version) LANDO age-depth model from Co1309 based on input data by Andreev et al. (2019) and Savelieva et al. (2019)

We apologize for not including the absolute years of the varve count and the radiocarbon date from Lake Pastorskoye (Subetto et al., 2002), used as an anchor point, published by Gromig et al. (2019) in our original version of the manuscript. As we have decided to streamline our data availability section, i.e., one publication per sediment core, we will now only include data reported by Gromig et al. (2019). Gromig et al. (2019) was the only one out of the three publications that provided a complete age-depth model. However, to allow for a comparison between LANDO and the published age-depth model, instead of modeling the entire core length of 22.7 m, we will also stop at the last varve point at 13.23 m. This avoids the problem of extrapolation.

**Table 2** shows all dating points published by Gromig et al. (2019), which used for the new age-depth model of Co1309. By including the new 30 age controls LANDO generates the output in **Figure 2**.

**Table 2** – Input data of Co1309 based on Gromig et al. (2019). LANDO input parameters “Lab-Location”, “Weight”, “Pretreatment”, “Reservoir Age”, and “Reservoir Error” not included in this table for readability.

| MeasurementID | Thickness (cm) | LabID   | Category                           | Material              | Uncalibrated Age (yr BP) | Uncalibrated Age Error (+/- yr) |
|---------------|----------------|---------|------------------------------------|-----------------------|--------------------------|---------------------------------|
| Co1309 35     | 1              | Co14057 | <sup>14</sup> C terrestrial fossil | organic macro remains | 2470                     | 54                              |

|              |    |             |                                          |                                    |       |      |
|--------------|----|-------------|------------------------------------------|------------------------------------|-------|------|
| Co1309 126.8 | 1  | Col4061.1.1 | <sup>14</sup> C<br>terrestrial<br>fossil | organic macro<br>remains           | 6681  | 58   |
| Co1309 130   | 10 | C-L3832     | other                                    | quartz silt<br>fraction            | 7000  | 300  |
| Co1309 131.8 | 1  | Col4065.1.1 | <sup>14</sup> C<br>terrestrial<br>fossil | organic macro<br>remains           | 10921 | 68   |
| Co1309 152.8 | 1  | Col4062.1.1 | <sup>14</sup> C<br>terrestrial<br>fossil | organic macro<br>remains           | 12214 | 69   |
| Co1309 202.7 | 1  | Varve1      | other                                    | varve                              | 11380 | 140  |
| Co1309 231.1 | 1  | Varve2      | other                                    | varve                              | 11480 | 140  |
| Co1309 268.8 | 1  | Varve3      | other                                    | varve                              | 11580 | 140  |
| Co1309 310.7 | 1  | Varve4      | other                                    | varve                              | 11680 | 140  |
| Co1309 351.4 | 1  | Varve5      | other                                    | varve                              | 11780 | 140  |
| Co1309 386.6 | 1  | Varve6      | other                                    | varve                              | 11980 | 140  |
| Co1309 426.9 | 1  | Varve7      | other                                    | varve                              | 12080 | 140  |
| Co1309 449.5 | 1  | Varve8      | other                                    | varve                              | 12180 | 140  |
| Co1309 472.2 | 1  | Varve9      | other                                    | varve                              | 12280 | 140  |
| Co1309 489.3 | 1  | Varve10     | other                                    | varve                              | 12380 | 140  |
| Co1309 506   | 1  | Varve11     | other                                    | varve                              | 12480 | 140  |
| Co1309 533   | 10 | C-L3835     | other                                    | quartz silt<br>fraction            | 14000 | 900  |
| Co1309 538.6 | 1  | Varve12     | other                                    | varve                              | 12580 | 140  |
| Co1309 575.9 | 1  | Varve13     | other                                    | varve                              | 12680 | 140  |
| Co1309 581   | 2  | Ua-14803    | <sup>14</sup> C<br>terrestrial<br>fossil | Mosses from<br>Lake<br>Pastorskoye | 10745 | 95   |
| Co1309 616.5 | 1  | Varve14     | other                                    | varve                              | 12780 | 140  |
| Co1309 651.7 | 1  | Varve15     | other                                    | varve                              | 12880 | 140  |
| Co1309 684.6 | 1  | Varve16     | other                                    | varve                              | 12980 | 140  |
| Co1309 724.6 | 1  | Varve17     | other                                    | varve                              | 13080 | 140  |
| Co1309 743   | 10 | C-L3836     | other                                    | quartz silt<br>fraction            | 17300 | 800  |
| Co1309 763.6 | 1  | Varve18     | other                                    | varve                              | 13180 | 140  |
| Co1309 798.5 | 1  | Varve19     | other                                    | varve                              | 13280 | 140  |
| Co1309 846.2 | 1  | Varve20     | other                                    | varve                              | 13380 | 140  |
| Co1309 897.4 | 1  | Varve21     | other                                    | varve                              | 13480 | 140  |
| Co1309 958.5 | 1  | Varve22     | other                                    | varve                              | 13580 | 140  |
| Co1309 960   | 10 | C-L3837     | other                                    | quartz silt<br>fraction            | 21800 | 1100 |

---

|               |    |         |       |                      |       |      |
|---------------|----|---------|-------|----------------------|-------|------|
| Co1309 1023.6 | 1  | Varve23 | other | varve                | 13680 | 140  |
| Co1309 1107.1 | 1  | Varve24 | other | varve                | 13780 | 140  |
| Co1309 1166   | 10 | C-L3838 | other | quartz/silt fraction | 23400 | 1400 |
| Co1309 1191   | 1  | Varve25 | other | varve                | 13880 | 140  |
| Co1309 1283.5 | 1  | Varve26 | other | varve                | 13980 | 140  |
| Co1309 1301.3 | 1  | Varve27 | other | varve                | 13894 | 140  |
| Co1309 1315.7 | 1  | Varve28 | other | varve                | 13905 | 140  |
| Co1309 1322.4 | 1  | Varve29 | other | varve                | 13910 | 140  |

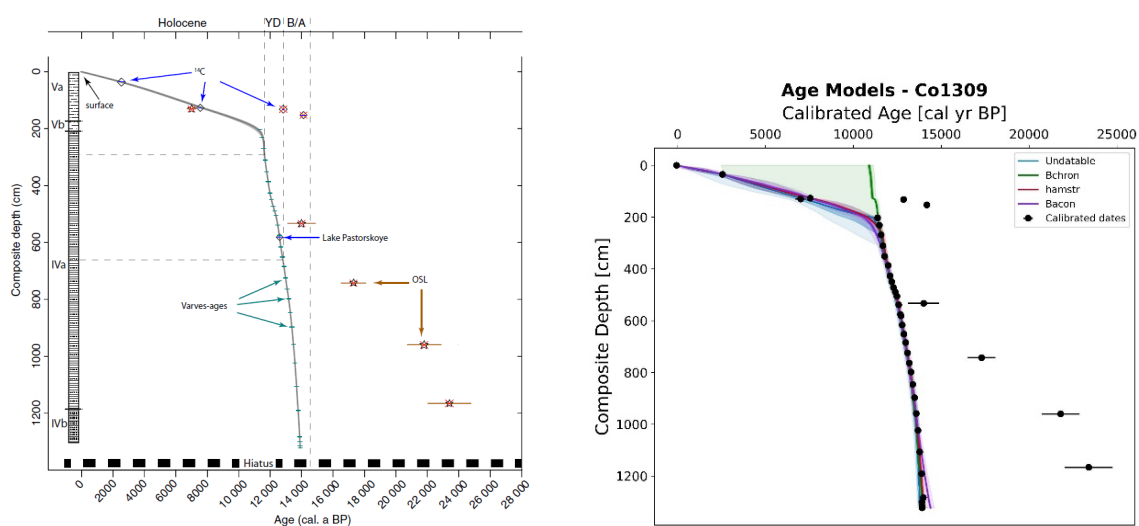

**Figure 4** – Comparison of age-depth model from Co1309 – Left: original published age-depth model by Gromig et al. (2019), Right: Corrected LANDO output for Co1309 to include in the revised version.

**Figure 2** shows that LANDO can reproduce the overall age-depth model by Gromig et al. (2019) without removing dating points.

Second, the sedimentation rates presented for core PG1205 from Basalt Lake in East Greenland are based on radiocarbon ages originally published by Wagner et al. (2000 in *Palaeo3*, 160: 45-68), although reference is made to the PhD thesis of Wagner (2000). The LANDO calculations suggest continuous and relatively constant sedimentation since at least 21 cal. ka BP. However, both Wagner et al. (2000) and Wagner (2000) state that the lake record consists of a till at its base, which in all likelihood was deposited during the Milne Land stade 11.30 - 11.15 cal. ka BP, overlaid by ca. 6.4 m of glaciolacustrine sediments deposited with high sedimentation rates during deglaciation and ca. 2.6 m of hemipelagic sediments deposited with much lower rates during the past ca. 10 ka BP. Hence, the calculations conducted by Pfalz et al. obviously neglect the regional glacial history presented and discussed by Wagner et al. (2000) and Wagner (2000) as well as many papers published before and afterwards, giving the wrong impression that this part of East Greenland became deglaciated already prior to 21 cal. ka BP.

For PG1205 two datasets exist on Pangaea – one dataset (<https://doi.pangaea.de/10.1594/PANGAEA.734962>) referencing the publication of Wagner et al. (2000) in Palaeo3, one dataset (<https://doi.pangaea.de/10.1594/PANGAEA.385643>) referencing the modified version of the PhD thesis of Wagner (2000) published in Reports on Polar Research (“Berichte zur Polarforschung”). Both datasets on Pangaea are identical in content. We referenced the dataset from the publication in Reports on Polar Research (<https://epic.awi.de/id/eprint/26538/>) because this publication was freely available and allowed us to review the content, while the publication in Palaeo3 ([https://doi.org/10.1016/S0031-0182\(00\)00046-8](https://doi.org/10.1016/S0031-0182(00)00046-8)) was initially behind a paywall and therefore not immediately accessible.

To ensure that we do not include grey literature in the references, we now use Wagner et al., (2000) as reference for the core PG1205. For this 9.85 m-long core we list all the publicly available dating points in **Table 3**, which produced the output in **Figure 3**.

**Table 3** – Input data of PG1205 based on Wagner et al. (2000). LANDO input parameters “Lab-Location”, “Weight”, “Pretreatment”, “Reservoir Age”, and “Reservoir Error” not included in this table for readability.

| MeasurementID | Thickness (cm) | LabID    | Category                  | Material         | Uncalibrated Age (yr BP) | Uncalibrated Age Error (+/- yr) |
|---------------|----------------|----------|---------------------------|------------------|--------------------------|---------------------------------|
| PG1205 33     | 2              | OxA-7253 | 14C<br>terrestrial fossil | twigs            | 845                      | 40                              |
| PG1205 41     | 2              | OxA-7286 | 14C<br>terrestrial fossil | twigs            | 985                      | 50                              |
| PG1205 89     | 2              | UtC-8453 | 14C<br>terrestrial fossil | leaves,<br>twigs | 3050                     | 80                              |
| PG1205 124    | 1              | OxA-7254 | 14C<br>terrestrial fossil | mosses           | 4175                     | 50                              |
| PG1205 149    | 2              | UtC-8222 | 14C<br>terrestrial fossil | leaves,<br>twigs | 5433                     | 35                              |
| PG1205 181    | 2              | OxA-7287 | 14C<br>terrestrial fossil | leaves,<br>twigs | 6455                     | 70                              |
| PG1205 241    | 2              | UtC-8454 | 14C<br>terrestrial fossil | leaves,<br>twigs | 8960                     | 160                             |

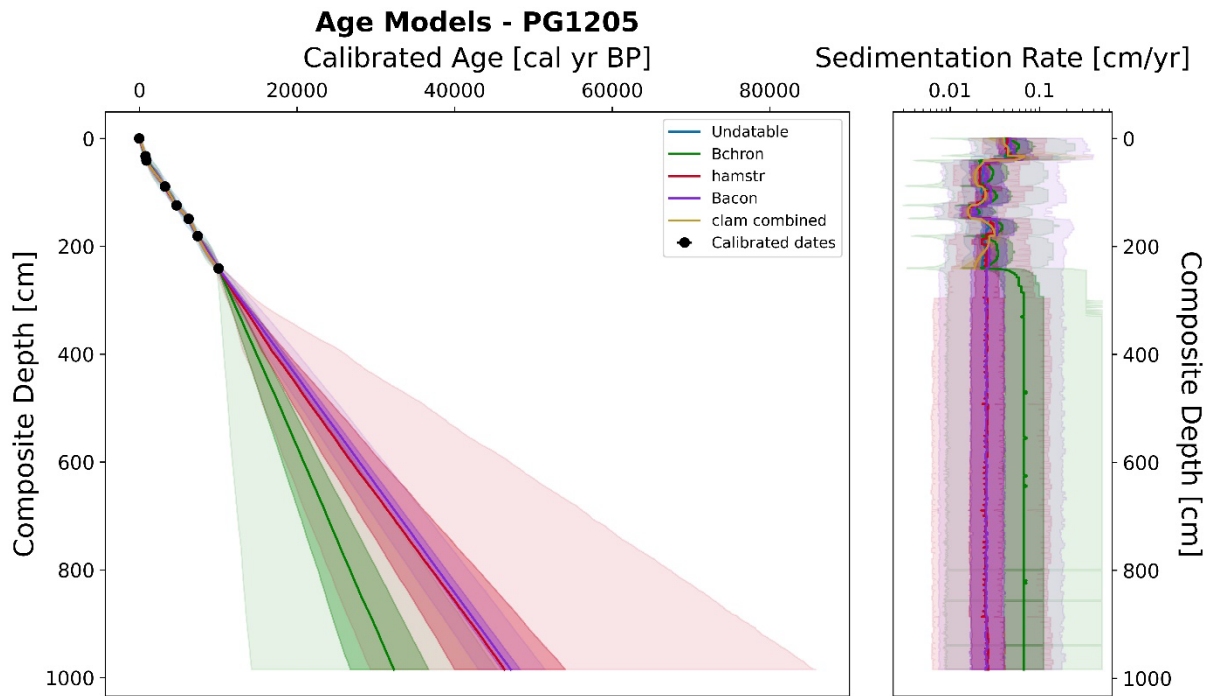

**Figure 3** – Previous (first submission version) LANDO age-depth model from PG1205 based on input data by Wagner et al. (2000)

Figure 3 shows why LANDO produces an output that is inconsistent with geological evidence. Since dating points are only available for the first 2.5 meters, LANDO has to extrapolate the remaining seven meters to cover the entire sediment core, which is an extreme case compared to other sediment cores. In the manuscript on Page 24, Lines 645-648 we stated that “[e]xtrapolating the age-depth models beyond age determination points always bears the risk that the extrapolated dates do not reflect the actual age. The implemented modeling systems account for this circumstance by increasing the uncertainty for these undated regions (Blaauw, 2010). While we are aware of this potential issue, we wanted to allow users to take advantage of the full age-depth coverage for their sediment core.” Similar to the Lake Ladoga sediment core Co1309, we changed the length of the sediment core to the last dating point to avoid strong extrapolation in the new version (Figure 4). We shall include an additional paragraph in the revised version addressing these extrapolation/hiatus issues of LANDO, as well as listing the CoreIDs where we had to adjust our models, so that readers can track our adjustments.



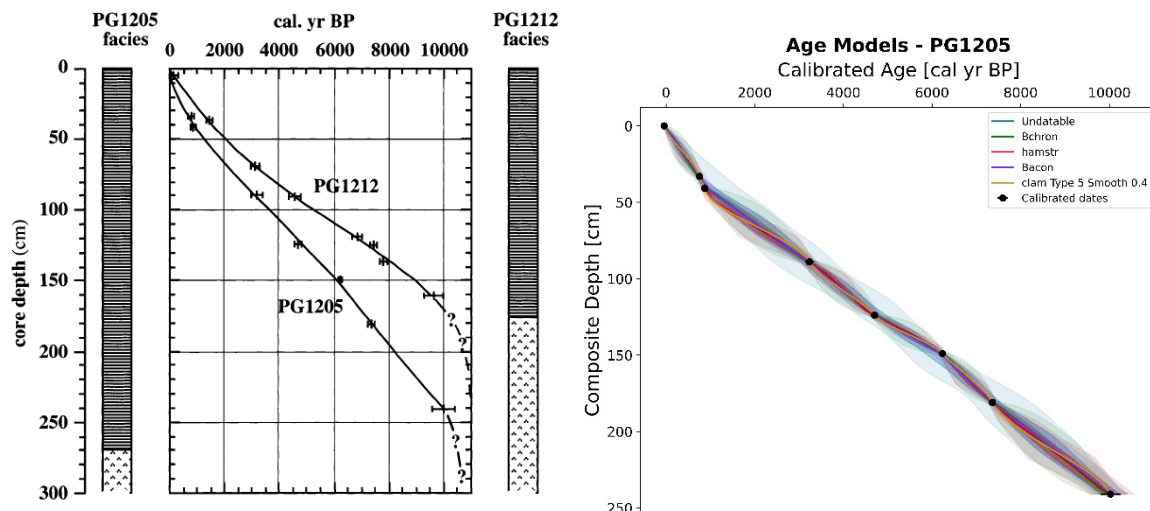

**Figure 4** – Comparison of age-depth model from PG1205 – Left: original published age-depth model by Wagner et al. (2000), Right: Corrected LANDO output for PG1205 to include in the revised version.

*These two examples illustrate that neglecting geological evidence for hiatuses or large changes in the rates of deposition can create much larger errors in age-depth models and resulting sedimentation rates than the employment of an age-depth modelling system that may not be ideal for the record investigated. From the two examples it becomes evident to us that the literature existing for all sediment records used in the third case study, not only Co1309 and PG1205, needs to be (re)studied and discussed to assure that the geological evidence provided is considered in the sedimentation rates calculated.*

Thank you for bringing this important matter to our attention. We agree and have re-examined all the sediment records closely by comparing the originally published age-depth models and the LANDO outputs. In addition to the two cases you mentioned, we found two other case, where we had to adjust the output. In all four cases discovered, we will discuss this issue in the revised version of the manuscript with reference to the original publication.
